# Supplementary material for: Molecular Recognition of Surface Trans-Sialidases in Extracellular Vesicles of the Parasite Trypanosoma cruzi Using Atomic Force Microscopy (AFM)
Source: MDPI journal article supplement (doi:10.3390/ijms23137193), 2022-06-28
Supplement: s1 [file s1]

## SUPPLEMENTARY MATERIALS

### **AFM molecular recognition of surface *trans*-sialidases of exosomes from *Trypanosoma cruzi***

Alexa Prescilla-Ledezma<sup>1,5\*</sup>, Fátima Linares<sup>2</sup>, Mariano Ortega-Muñoz<sup>2</sup>, Lissette Retana Moreira<sup>1,6,7</sup>, Ana Belén Jódar-Reyes<sup>4</sup>, Fernando Hernandez-Mateo<sup>3</sup>, Francisco Santoyo-Gonzalez<sup>3</sup> and Antonio Osuna<sup>1</sup>

- <sup>1</sup> Grupo de Bioquímica y Parasitología Molecular (CTS 183), Departamento de Parasitología, Campus de Fuentenueva, Instituto de Biotecnología, Universidad de Granada, 18071 Granada, Spain
- <sup>2</sup> Unidad de Microscopía de Fuerza Atómica, Centro de Instrumentación Científica, Universidad de Granada, 18071, Granada, Spain
- <sup>3</sup> Departamento de Química Orgánica, Facultad de Ciencias, Universidad de Granada, 18071 Granada, Spain
- <sup>4</sup> Grupo de Física de Fluidos y Biocoloides (FQM 115), Excellence Research Unit Modeling Nature (MNat), Departamento de Física Aplicada, Facultad de Ciencias, Universidad de Granada, 18071 Granada, Spain
- <sup>5</sup> Departamento de Microbiología Humana, Facultad de Medicina, Universidad de Panamá, Ciudad de Panamá 0824, Panamá.
- <sup>6</sup> Departamento de Parasitología, Facultad de Microbiología, Universidad de Costa Rica, San José 2060, Costa Rica.
- <sup>7</sup> Centro de Investigación en Enfermedades Tropicales (CIET), Universidad de Costa Rica. San José 2060, Costa Rica

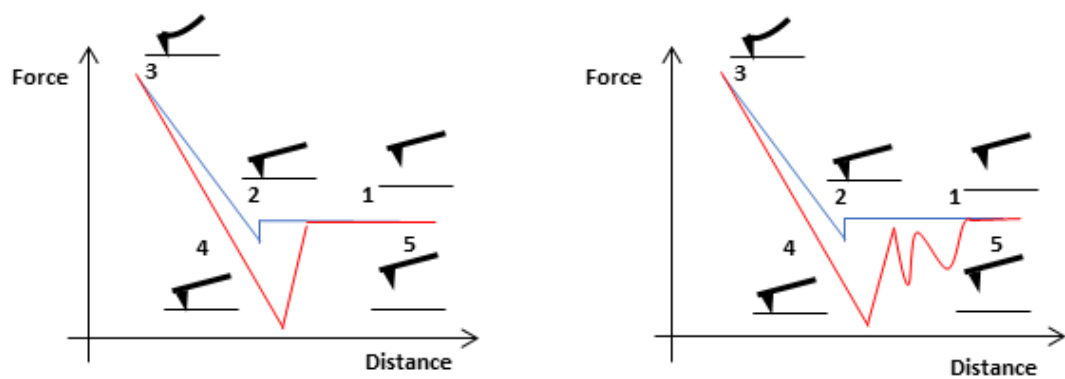

**Figure S1:** Schematic representation of examples of F-D plots for the tip-sample interaction (left) and for a molecular recognition experiment (right).
